# Supplementary material for: Lanthanide/actinide boride nanoclusters and nanomaterials based on boron frameworks consisting of conjoined Bnrings (n= 7–9)
Source: Royal Society of Chemistry journal article supplement (doi:10.1039/d2cp03142f), 2022-01-01
Supplement: d2cp03142f1.pdf [file d2cp03142f1.pdf]

## Supporting information

# Lanthanide/actinide boride nanoclusters and nanomaterials based on boron frameworks consisting of conjoined $B_n$ rings ( $n = 7, 8, 9$ )

Xiao-Qin Lu,<sup>ab</sup> Xiao-Ni Zhao,<sup>a</sup> Yue-Wen Mu<sup>\*a</sup>, and Si-Dian Li<sup>\*a</sup>

<sup>a</sup> Nanocluster Laboratory, Institute of Molecular Science Shanxi University, Taiyuan, Shanxi 030006, China.

<sup>b</sup> Shanxi Center for Testing of Functional Agro-Products, Shanxi Agricultural University, Taiyuan, Shanxi 030006, China

\*E-mails: ywmu@sxu.edu.cn, lisidian@sxu.edu.cn

## Table of Contents

**Figure S1.** Relative energies of low-lying isomers of  $Ac_2B_7^-$  and  $M_4B_{13}^-$  ( $M = La, Ac$ ).

**Figure S2.** Relative energies of low-lying isomers of  $Ac_2B_8$ ,  $M_4B_{15}^-$ ,  $M_4B_{18}$ , and  $Ac_7B_{24}^+$  ( $M = La, Ac$ ).

**Figure S3.** Relative energies of low-lying isomers of  $Ac_2B_9^-$ ,  $Ac_4B_{24}$ ,  $M_5B_{24}^+$ , and  $Ac_4B_{29}^-$  ( $M = La, Ac$ ).

**Figure S4.** Geometry analysis and NBO analysis of  $La_4B_{13}^-$  (**2**) and  $La_4B_{15}^-$  (**4**) at the PBE0 level.

**Figure S5.** Born-Oppenheimer molecular dynamics simulations of  $M_4B_{13}^-$  (**2/2'**),  $M_4B_{15}^-$  (**4/4'**), and  $M_4B_{18}$  (**5/5'**) ( $M = La, Ac$ ).

**Figure S6.** Canonical molecular orbitals of  $La_4B_{13}^-$  (**2**),  $La_4B_{15}^-$  (**4**), and  $La_4B_{18}$  (**5**).

**Table S1.** Optimized coordinates (x, y, z) of  $C_{2v}$  (**1'**),  $C_2$   $La_4B_{13}^-$  (**2**)/ $Ac_4B_{13}^-$  (**2'**),  $D_{8h}$   $Ac_2B_8$  (**3'**),  $D_2$   $La_4B_{15}^-$  (**4**)/ $Ac_4B_{15}^-$  (**4'**),  $C_{3v}/C_3$   $La_4B_{18}$  (**5**)/ $Ac_4B_{18}$  (**5'**),  $O_h$   $Ac_7B_{24}^+$  (**6'**),  $D_{9h}$   $Ac_2B_9^-$  (**7'**),  $T_d$   $Ac_4B_{24}$  (**8'**),  $C_1$   $La_5B_{24}^+$  (**9**)/ $Ac_5B_{24}^+$  (**9'**), and  $T_d$   $Ac_4B_{29}^-$  (**10'**) at PBE0 level and 1D  $Ac_{10}B_{32}$  (**11'**), 2D  $Ac_3B_{10}$  (**12'**), and 3D  $AcB_6$  (**13'**) at PBE level.

**Fig. S1** Relative energies of low-lying isomers of  $C_{2v}$   $Ac_2B_7^-$  (**1'**),  $C_2$   $M_4B_{13}^-$  (**2/2'**) (M = La, Ac) at CCSD(T) (square brackets), PBE0, and TPSSh (parentheses) levels in eV.

(**1'**)  $Ac_2B_7^-$

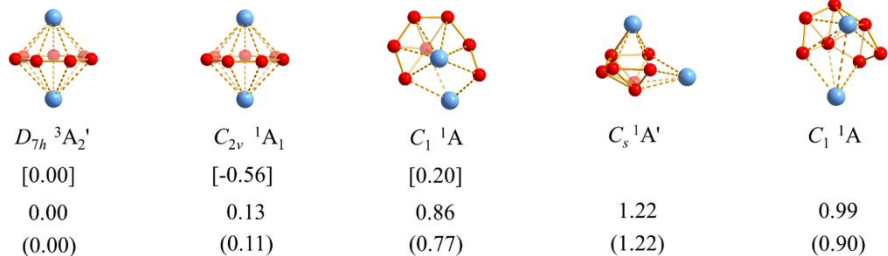

(**2**)  $La_4B_{13}^-$

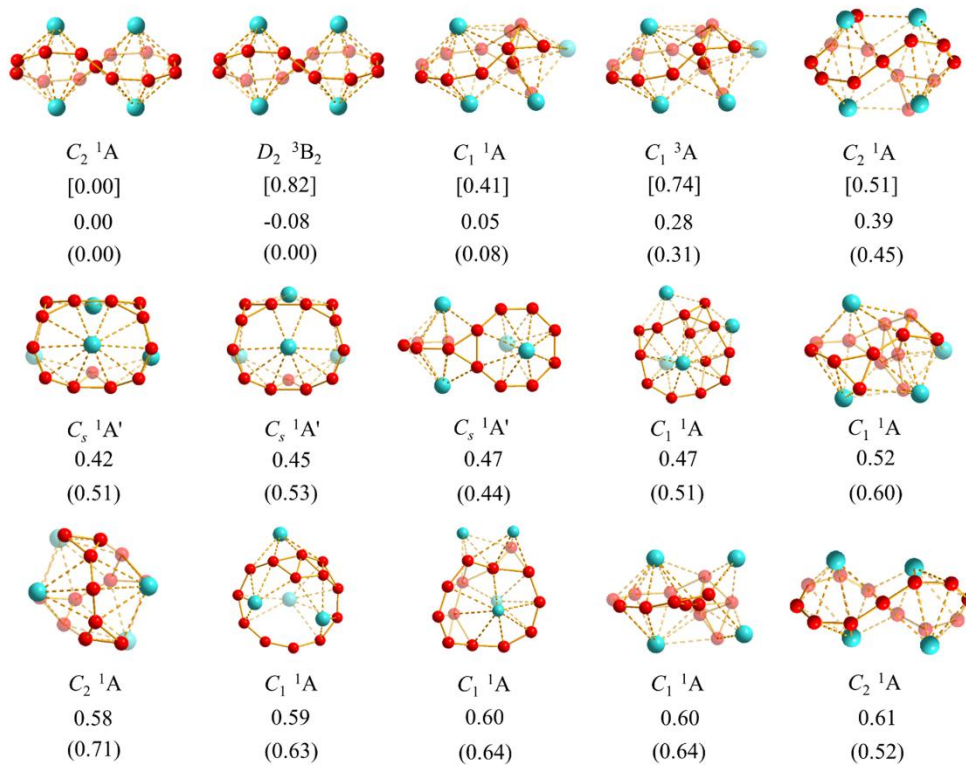

(**2'**)  $Ac_4B_{13}^-$

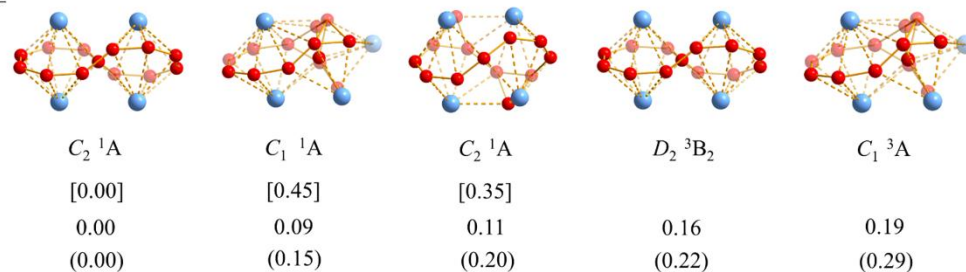

**Fig. S2** Relative energies of low-lying isomers of  $D_{8h}$   $\text{Ac}_2\text{B}_8$  (**3'**),  $D_2$   $\text{M}_4\text{B}_{15}^-$  (**4/4'**),  $C_{3v}/C_3$   $\text{M}_4\text{B}_{18}$  (**5/5'**), and  $O_h$   $\text{Ac}_7\text{B}_{24}^+$  (**6'**) (M = La, Ac) at CCSD(T) (square brackets), PBE0, and TPSSh (parentheses) levels in eV.

(3')  $\text{Ac}_2\text{B}_8$

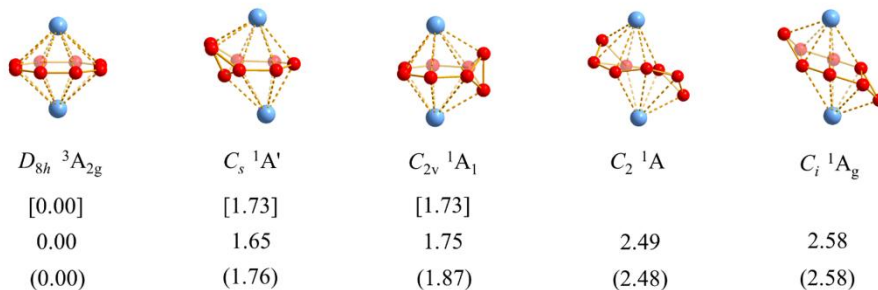

(4)  $\text{La}_4\text{B}_{15}^-$

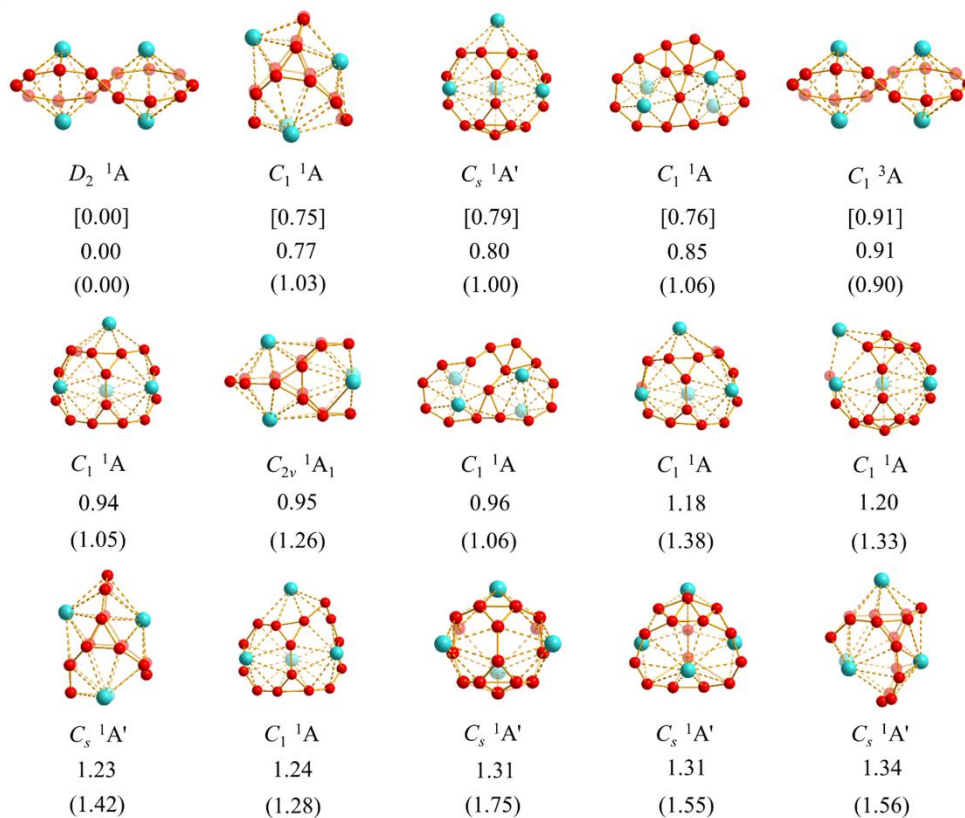

(4')  $\text{Ac}_4\text{B}_{15}^-$

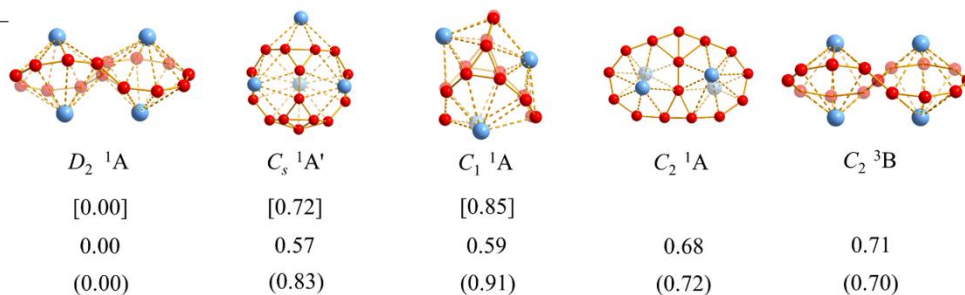

(5)  $\text{La}_4\text{B}_{18}$

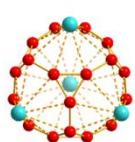

$C_{3v} \ ^1A_1$   
[0.00]  
0.00  
(0.00)

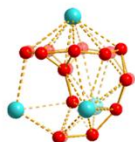

$C_s \ ^1A'$   
[0.07]  
0.09  
(0.21)

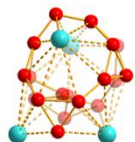

$C_1 \ ^1A$   
[0.81]  
0.71  
(0.85)

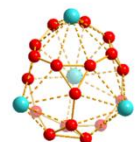

$C_1 \ ^1A$   
[0.86]  
0.75  
(0.98)

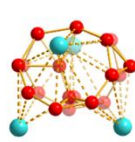

$C_s \ ^1A'$   
[1.02]  
0.79  
(1.03)

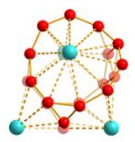

$C_1 \ ^1A$   
0.80  
(0.99)

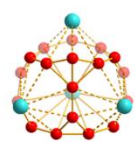

$C_s \ ^1A'$   
0.82  
(0.90)

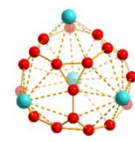

$C_1 \ ^1A$   
0.85  
(0.82)

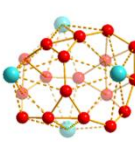

$C_1 \ ^1A$   
0.93  
(1.16)

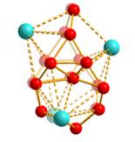

$C_s \ ^1A'$   
0.95  
(1.05)

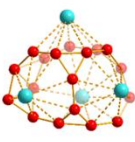

$C_1 \ ^1A$   
1.00  
(1.23)

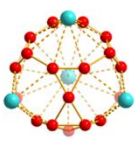

$C_s \ ^1A'$   
1.07  
(1.15)

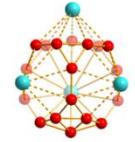

$C_s \ ^1A'$   
1.07  
(1.26)

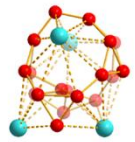

$C_1 \ ^3A$   
1.08  
(1.25)

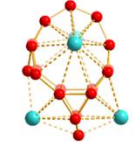

$C_s \ ^1A'$   
1.11  
(1.38)

(5')  $\text{Ac}_4\text{B}_{18}$

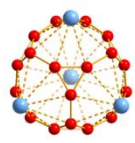

$C_3 \ ^1A$   
0.00  
(0.00)

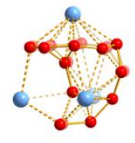

$C_s \ ^1A'$   
0.23  
(0.34)

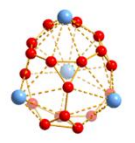

$C_1 \ ^1A$   
0.93  
(1.07)

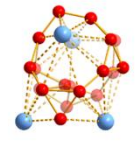

$C_1 \ ^1A$   
0.94  
(1.17)

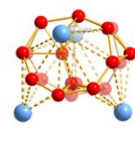

$C_s \ ^1A'$   
1.24  
(1.48)

(6')  $\text{Ac}_7\text{B}_{24}^+$

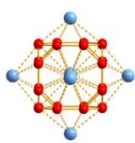

$O_h \ ^1A_{1g}$   
0.00  
(0.00)

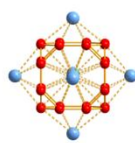

$C_i \ ^3A_u$   
1.06  
(1.13)

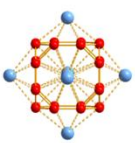

$C_1 \ ^5A_{1g}$   
2.18  
(2.29)

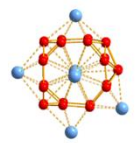

$C_s \ ^1A'$   
2.81  
(2.81)

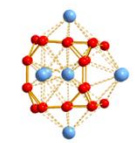

$C_{2v} \ ^1A_1$   
3.11  
(3.13)

**Fig. S3** Relative energies of low-lying isomers of  $D_{9h}$   $\text{Ac}_2\text{B}_9^-$  (**7'**),  $T_d$   $\text{Ac}_4\text{B}_{24}$  (**8'**),  $C_1$   $\text{M}_5\text{B}_{24}^+$  (**9/9'**), and  $T_d$   $\text{Ac}_4\text{B}_{29}^-$  (**10'**) (M = La, Ac) at CCSD(T) (square brackets), PBE0, and TPSSh (parentheses) levels in eV.

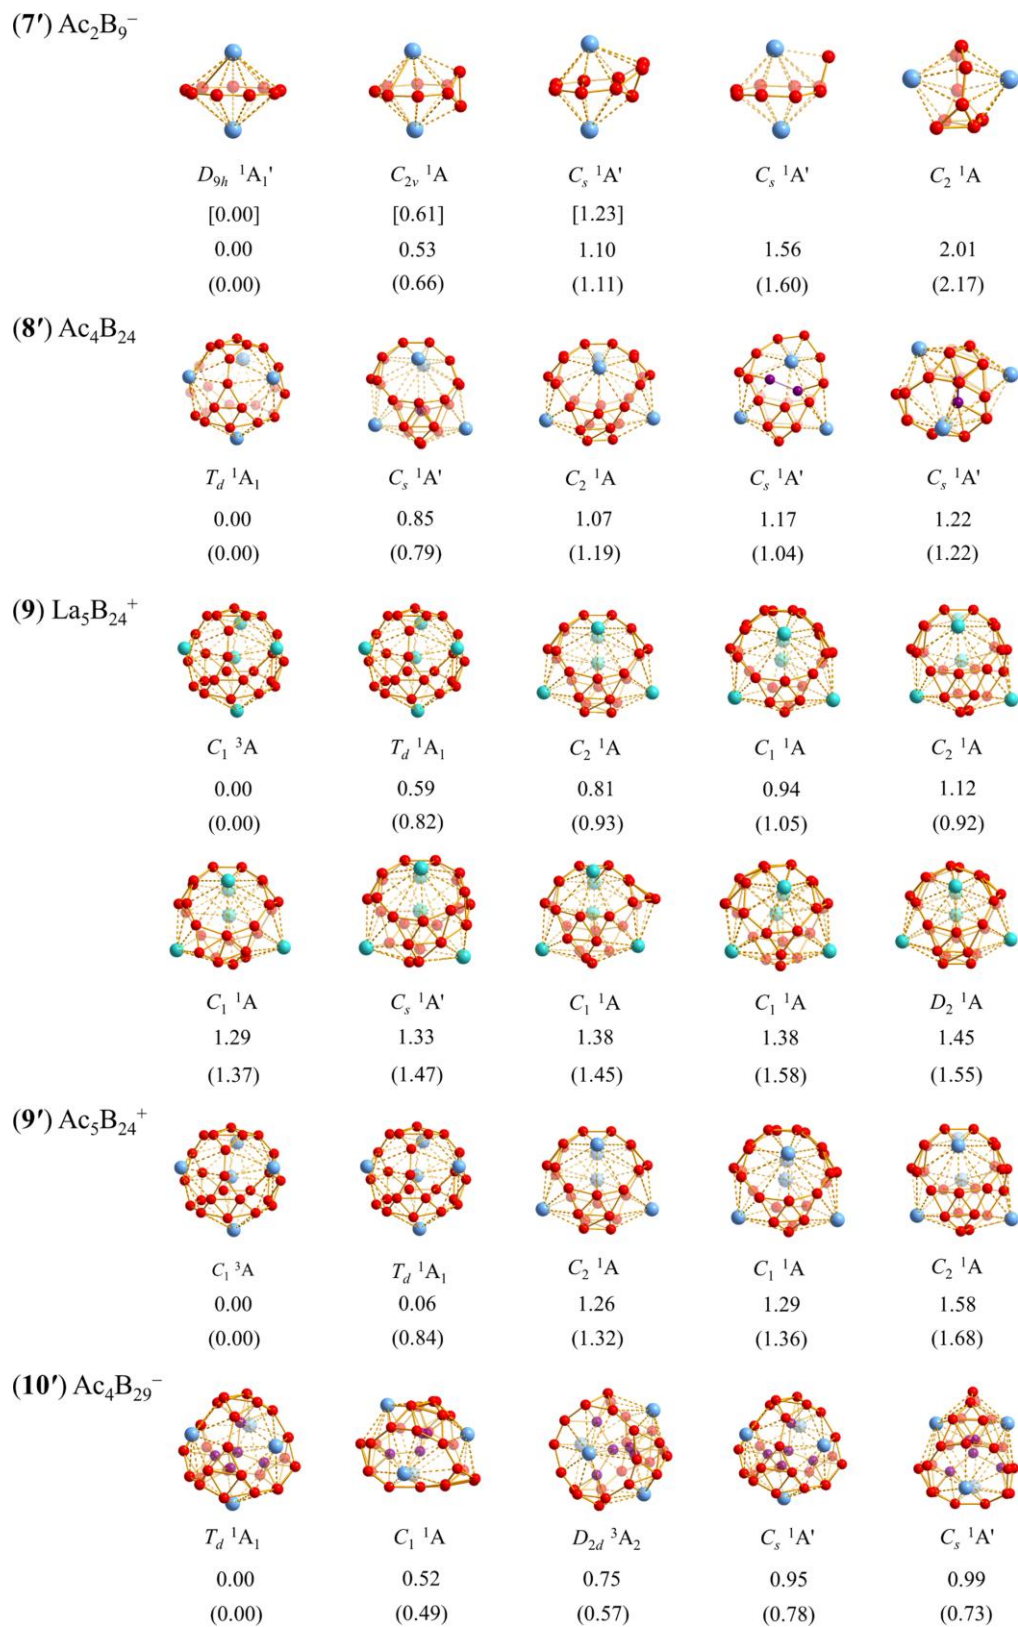



**Fig. S4** Geometry analysis and NBO analysis of bicyclic helical  $\text{La}_4\text{B}_{13}^-$  (**2**) and  $\text{La}_4\text{B}_{15}^-$  (**4**) at the PBE0 level. The B-B bond length is indicated in blue and the natural atomic charge is indicated in black.

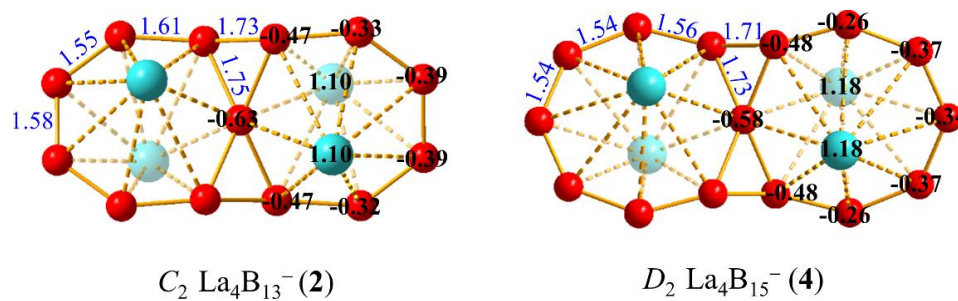

**Fig. S5** Born-Oppenheimer molecular dynamics simulations of  $M_4B_{13}^-$  (**2/2'**),  $M_4B_{15}^-$  (**4/4'**), and  $M_4B_{18}$  (**5/5'**) ( $M = La, Ac$ ) at 800 K. The root-mean-square-deviation (RMSD) and maximum bond length deviation (MAXD) values (on average) are indicated in Å.

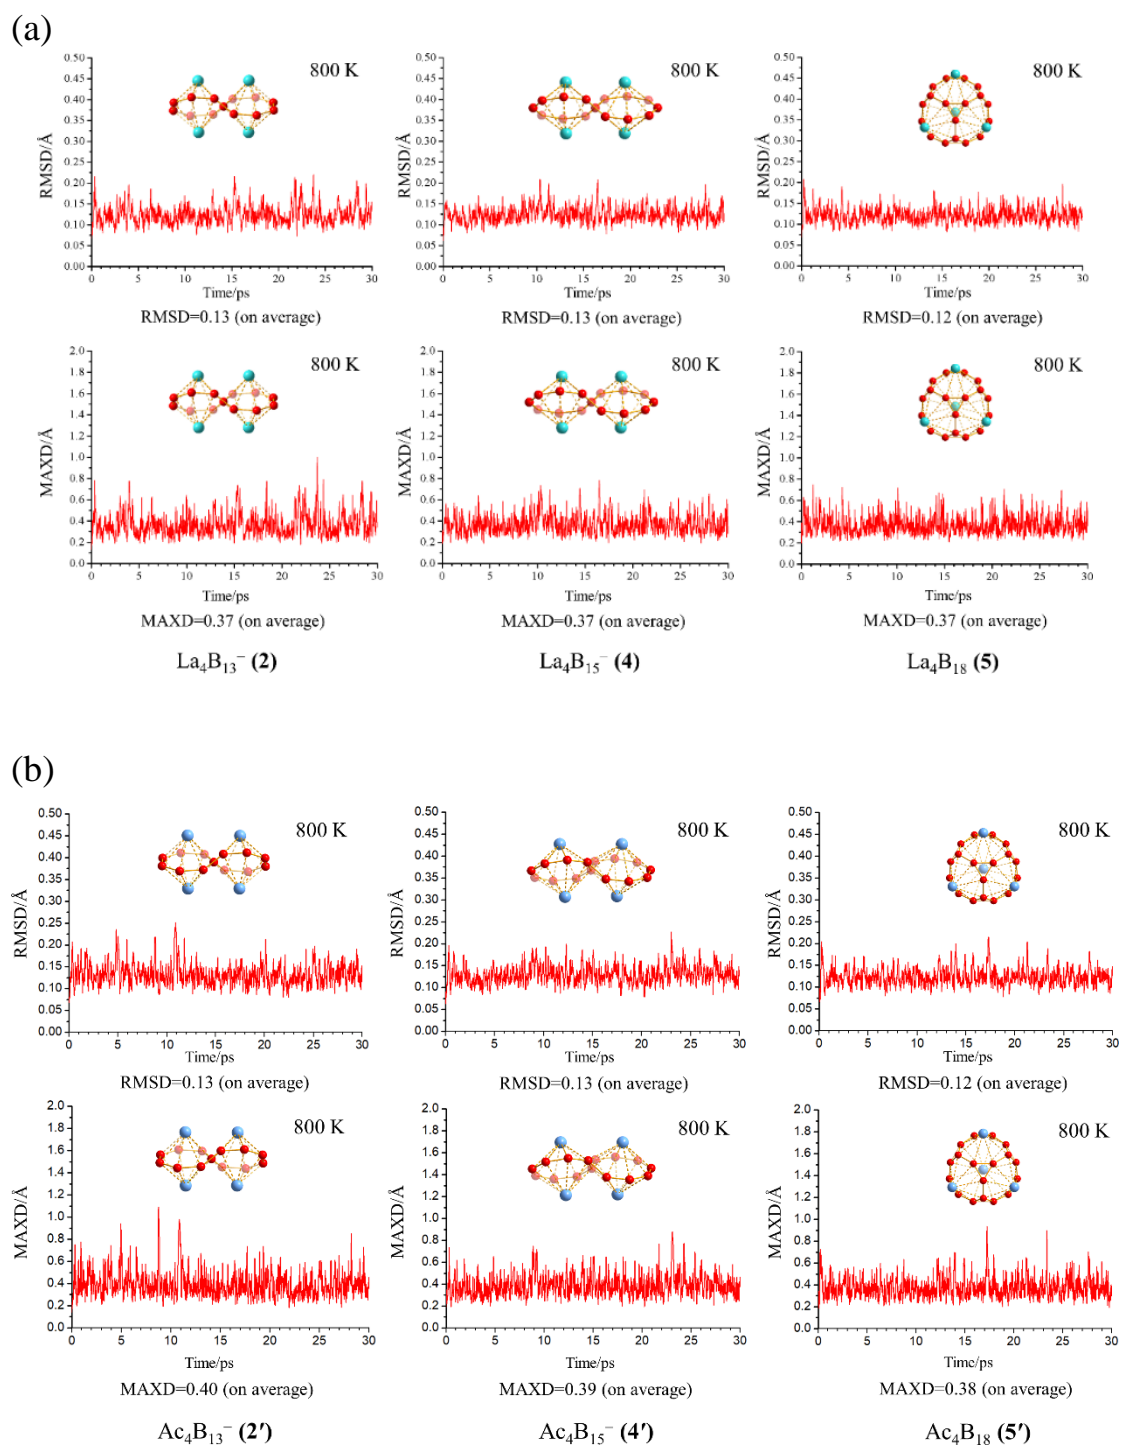

**Fig. S6** Canonical molecular orbitals (CMOs) of (a)  $\text{La}_4\text{B}_{13}^-$  (**2**), (b)  $\text{La}_4\text{B}_{15}^-$  (**4**), and (c)  $\text{La}_4\text{B}_{18}$  (**5**).

(a)  $\text{La}_4\text{B}_{13}^-$

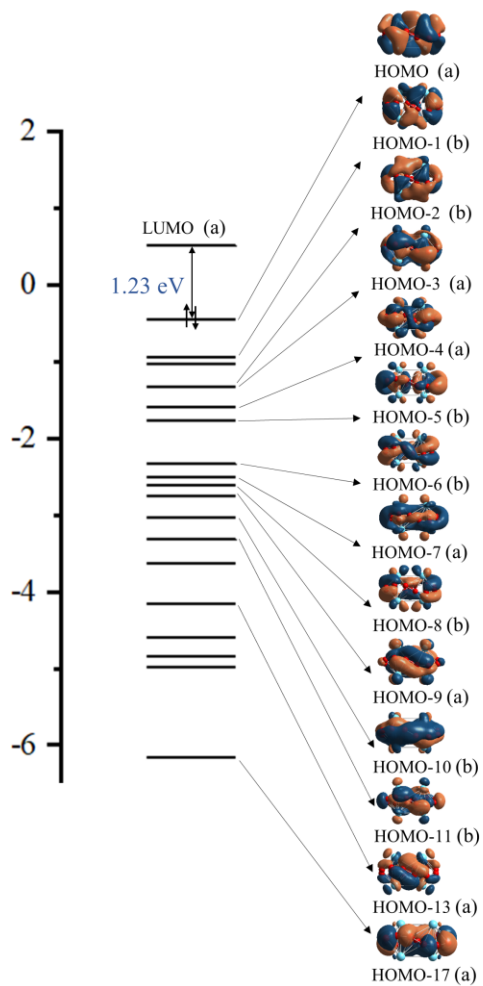

(b)  $\text{La}_4\text{B}_{15}^-$

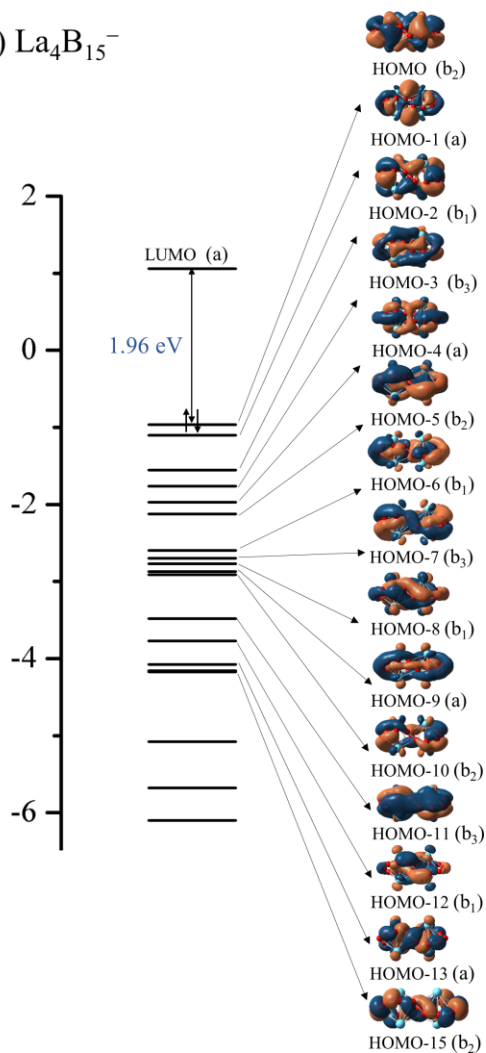



(c)  $\text{La}_4\text{B}_{18}$

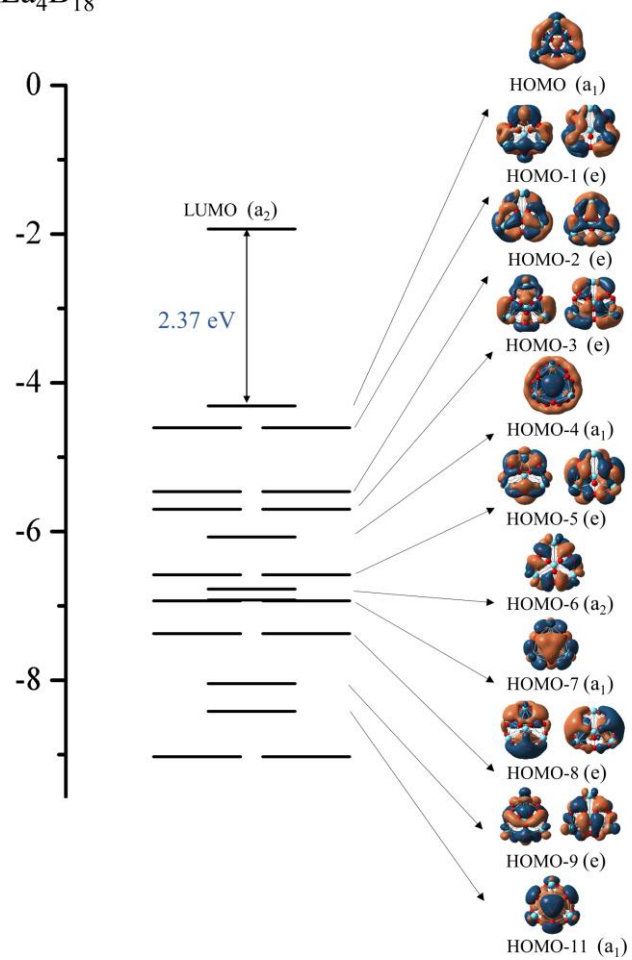

**Table S1** Optimized coordinates (x, y, z) of  $C_{2v}$   $Ac_2B_7^-$  (**1'**),  $C_2$   $La_4B_{13}^-$  (**2**)/ $Ac_4B_{13}^-$  (**2'**),  $D_{8h}$   $Ac_2B_8$  (**3'**),  $D_2$   $La_4B_{15}^-$  (**4**)/ $Ac_4B_{15}^-$  (**4'**),  $C_{3v}/C_3$   $La_4B_{18}$  (**5**)/ $Ac_4B_{18}$  (**5'**),  $O_h$   $Ac_7B_{24}^+$  (**6'**),  $D_{9h}$   $Ac_2B_9^-$  (**7'**),  $T_d$   $Ac_4B_{24}$  (**8'**),  $C_1$   $La_5B_{24}^+$  (**9**)/ $Ac_5B_{24}^+$  (**9'**), and  $T_d$   $Ac_4B_{29}^-$  (**10'**) at PBE0 level and 1D  $Ac_{10}B_{32}$  (**11'**), 2D  $Ac_3B_{10}$  (**12'**), and 3D  $AcB_6$  (**13'**) at PBE level.

$C_{2v}$   $Ac_2B_7^-$  (**1'**)

|    |             |             |             |
|----|-------------|-------------|-------------|
| B  | 0.00000000  | 0.00000000  | 1.83250600  |
| B  | 0.00000000  | 0.82123900  | -1.64255100 |
| B  | 0.00000000  | 1.78639500  | -0.43470500 |
| B  | 0.00000000  | -1.78639500 | -0.43470500 |
| B  | 0.00000000  | -1.41643600 | 1.14192200  |
| B  | 0.00000000  | 1.41643600  | 1.14192200  |
| B  | 0.00000000  | -0.82123900 | -1.64255100 |
| Ac | 1.99306600  | 0.00000000  | 0.00107200  |
| Ac | -1.99306600 | 0.00000000  | 0.00107200  |

$C_2$   $La_4B_{13}^-$  (**2**)

|    |             |             |             |
|----|-------------|-------------|-------------|
| B  | 0.00000000  | 3.57931400  | -0.27819600 |
| B  | 1.44471500  | 3.27564000  | 0.27733800  |
| B  | -1.12999600 | 2.57257100  | -0.63454000 |
| B  | 2.07188400  | 1.89844400  | 0.63452500  |
| B  | 1.63180500  | 0.35173800  | 0.53783600  |
| B  | 0.00000000  | 0.00000000  | 0.00032300  |
| B  | -1.35139300 | 0.97982700  | -0.53745000 |
| La | 1.07511800  | 1.58077300  | -1.80905700 |
| La | -0.34525100 | 1.88063000  | 1.80908500  |
| B  | 0.00000000  | -3.57931400 | -0.27819600 |
| B  | 1.12999600  | -2.57257100 | -0.63454000 |
| B  | -2.07188400 | -1.89844400 | 0.63452500  |
| B  | -1.63180500 | -0.35173800 | 0.53783600  |
| B  | 1.35139300  | -0.97982700 | -0.53745000 |
| B  | -1.44471500 | -3.27564000 | 0.27733800  |
| La | 0.34525100  | -1.88063000 | 1.80908500  |
| La | -1.07511800 | -1.58077300 | -1.80905700 |

$C_2 \text{Ac}_4\text{B}_{13}^-$  (**2'**)

|    |             |             |             |
|----|-------------|-------------|-------------|
| B  | 0.00000000  | 3.57513300  | -0.26923100 |
| B  | 1.45034600  | 3.26788900  | 0.26889500  |
| B  | -1.12842600 | 2.57191700  | -0.63000600 |
| B  | 2.07475600  | 1.89324300  | 0.63014800  |
| B  | 1.63989000  | 0.34963400  | 0.52751000  |
| B  | 0.00000000  | 0.00000000  | 0.00022700  |
| B  | -1.35718900 | 0.98463500  | -0.52743700 |
| B  | 0.00000000  | -3.57513300 | -0.26923100 |
| B  | 1.12842600  | -2.57191700 | -0.63000600 |
| B  | -2.07475600 | -1.89324300 | 0.63014800  |
| B  | -1.63989000 | -0.34963400 | 0.52751000  |
| B  | 1.35718900  | -0.98463500 | -0.52743700 |
| B  | -1.45034600 | -3.26788900 | 0.26889500  |
| Ac | -0.36544600 | 1.90584100  | 1.90404300  |
| Ac | 1.10723900  | 1.59351100  | -1.90404300 |
| Ac | -1.10723900 | -1.59351100 | -1.90404300 |
| Ac | 0.36544600  | -1.90584100 | 1.90404300  |

 $D_{8h} \text{Ac}_2\text{B}_8$  (**3'**)

|    |             |             |             |
|----|-------------|-------------|-------------|
| B  | 0.00000000  | 2.03032500  | 0.00000000  |
| B  | -1.43565600 | 1.43565600  | 0.00000000  |
| B  | 1.43565600  | 1.43565600  | 0.00000000  |
| B  | -2.03032500 | 0.00000000  | 0.00000000  |
| B  | -1.43565600 | -1.43565600 | 0.00000000  |
| B  | 0.00000000  | -2.03032500 | 0.00000000  |
| B  | 1.43565600  | -1.43565600 | 0.00000000  |
| B  | 2.03032500  | 0.00000000  | 0.00000000  |
| Ac | 0.00000000  | 0.00000000  | 1.93885400  |
| Ac | 0.00000000  | 0.00000000  | -1.93885400 |

$D_2 \text{La}_4\text{B}_{15}^-$  (4)

|    |             |             |             |
|----|-------------|-------------|-------------|
| B  | -1.50069700 | 0.56929900  | -0.63502400 |
| B  | -1.89021800 | 0.74473900  | -2.14033600 |
| B  | 1.50069700  | -0.56929900 | -0.63502400 |
| B  | 1.89021800  | -0.74473900 | -2.14033600 |
| B  | 1.33622700  | -0.50074400 | -3.56125000 |
| B  | 0.00000000  | 0.00000000  | -4.14989400 |
| B  | -1.33622700 | 0.50074400  | -3.56125000 |
| B  | 1.50069700  | 0.56929900  | 0.63502400  |
| B  | 0.00000000  | 0.00000000  | 0.00000000  |
| B  | 1.89021800  | 0.74473900  | 2.14033600  |
| B  | -1.50069700 | -0.56929900 | 0.63502400  |
| B  | -1.89021800 | -0.74473900 | 2.14033600  |
| B  | -1.33622700 | -0.50074400 | 3.56125000  |
| B  | 0.00000000  | 0.00000000  | 4.14989400  |
| B  | 1.33622700  | 0.50074400  | 3.56125000  |
| La | -0.66219000 | 1.69877700  | 1.96403300  |
| La | 0.66219000  | -1.69877700 | 1.96403300  |
| La | -0.66219000 | -1.69877700 | -1.96403300 |
| La | 0.66219000  | 1.69877700  | -1.96403300 |

$D_2 \text{Ac}_4\text{B}_{15}^-$  (4')

|    |             |             |             |
|----|-------------|-------------|-------------|
| B  | -1.49909300 | 0.56992700  | -0.64381500 |
| B  | -1.89482400 | 0.73370600  | -2.15224000 |
| B  | 1.49909300  | -0.56992700 | -0.64381500 |
| B  | 1.89482400  | -0.73370600 | -2.15224000 |
| B  | 1.34366800  | -0.49164000 | -3.57740800 |
| B  | 0.00000000  | 0.00000000  | -4.16592700 |
| B  | -1.34366800 | 0.49164000  | -3.57740800 |
| B  | 1.49909300  | 0.56992700  | 0.64381500  |
| B  | 0.00000000  | 0.00000000  | 0.00000000  |
| B  | 1.89482400  | 0.73370600  | 2.15224000  |
| B  | -1.49909300 | -0.56992700 | 0.64381500  |
| B  | -1.89482400 | -0.73370600 | 2.15224000  |
| B  | -1.34366800 | -0.49164000 | 3.57740800  |
| B  | 0.00000000  | 0.00000000  | 4.16592700  |
| B  | 1.34366800  | 0.49164000  | 3.57740800  |
| Ac | 0.68597600  | 1.76900000  | -1.99290000 |
| Ac | -0.68597600 | 1.76900000  | 1.99290000  |
| Ac | -0.68597600 | -1.76900000 | -1.99290000 |
| Ac | 0.68597600  | -1.76900000 | 1.99290000  |

$C_{3v} \text{La}_4\text{B}_{18} (5)$ 

|    |             |             |             |
|----|-------------|-------------|-------------|
| B  | -0.81707700 | -0.47174000 | -1.33615400 |
| B  | 0.00000000  | 0.94347900  | -1.33615400 |
| B  | 0.00000000  | 2.41248300  | -0.49245800 |
| B  | -0.85327800 | 2.66607700  | 0.87128700  |
| B  | -2.07402800 | 2.07088900  | 1.69302900  |
| B  | -2.08927100 | -1.20624100 | -0.49245800 |
| B  | 2.08927100  | -1.20624100 | -0.49245800 |
| B  | 2.07402800  | 2.07088900  | 1.69302900  |
| B  | 0.85327800  | 2.66607700  | 0.87128700  |
| B  | 0.81707700  | -0.47174000 | -1.33615400 |
| B  | -2.73552900 | -0.59407900 | 0.87128700  |
| B  | -2.83045600 | 0.76071600  | 1.69302900  |
| B  | -0.75642800 | -2.83160500 | 1.69302900  |
| B  | -1.88225200 | -2.07199900 | 0.87128700  |
| B  | 0.75642800  | -2.83160500 | 1.69302900  |
| B  | 1.88225200  | -2.07199900 | 0.87128700  |
| B  | 2.73552900  | -0.59407900 | 0.87128700  |
| B  | 2.83045600  | 0.76071600  | 1.69302900  |
| La | 0.00000000  | 0.00000000  | 1.75860000  |
| La | -2.58473900 | 1.49230000  | -0.87567500 |
| La | 2.58473900  | 1.49230000  | -0.87567500 |
| La | 0.00000000  | -2.98459900 | -0.87567500 |



$C_3 \text{Ac}_4\text{B}_{18} (5')$ 

|    |             |             |             |
|----|-------------|-------------|-------------|
| B  | -0.81798000 | -0.47237700 | -1.27427900 |
| B  | -0.00010100 | 0.94458000  | -1.27427900 |
| B  | 0.00000000  | 2.41907700  | -0.42539600 |
| B  | -0.85622100 | 2.67188800  | 0.93316100  |
| B  | -2.09427500 | 2.08235800  | 1.74842100  |
| B  | -2.09498200 | -1.20953800 | -0.42539600 |
| B  | 2.09498200  | -1.20953800 | -0.42539600 |
| B  | 2.09368800  | 2.08183600  | 1.74963800  |
| B  | 0.85601200  | 2.67196300  | 0.93388000  |
| B  | 0.81808000  | -0.47220300 | -1.27427900 |
| B  | -2.74199400 | -0.59465300 | 0.93388000  |
| B  | -2.84976700 | 0.77226900  | 1.74963800  |
| B  | -0.75623800 | -2.85487400 | 1.74842100  |
| B  | -1.88581200 | -2.07745300 | 0.93316100  |
| B  | 0.75607900  | -2.85410500 | 1.74963800  |
| B  | 1.88598100  | -2.07731000 | 0.93388000  |
| B  | 2.74203300  | -0.59443500 | 0.93316100  |
| B  | 2.85051200  | 0.77251600  | 1.74842100  |
| Ac | 0.00000000  | 0.00000000  | 1.96249800  |
| Ac | -2.63942300 | 1.52236900  | -0.86008900 |
| Ac | 0.00130100  | -3.04699200 | -0.86008900 |
| Ac | 2.63812200  | 1.52462300  | -0.86008900 |

$O_h \text{Ac}_7\text{B}_{24}^+ (6')$ 

|    |             |             |             |
|----|-------------|-------------|-------------|
| B  | 0.84799800  | 2.01422200  | 2.01422200  |
| B  | 2.01422200  | 2.01422200  | 0.84799800  |
| B  | 2.01422200  | 2.01422200  | -0.84799800 |
| B  | 0.84799800  | 2.01422200  | -2.01422200 |
| B  | -0.84799800 | 2.01422200  | -2.01422200 |
| B  | -0.84799800 | 2.01422200  | 2.01422200  |
| B  | 2.01422200  | -0.84799800 | 2.01422200  |
| B  | 2.01422200  | -0.84799800 | -2.01422200 |
| B  | 2.01422200  | 0.84799800  | -2.01422200 |
| B  | 2.01422200  | 0.84799800  | 2.01422200  |
| B  | -2.01422200 | 2.01422200  | 0.84799800  |
| B  | -2.01422200 | 2.01422200  | -0.84799800 |
| B  | -2.01422200 | 0.84799800  | -2.01422200 |
| B  | -2.01422200 | -0.84799800 | -2.01422200 |
| B  | -2.01422200 | -2.01422200 | -0.84799800 |
| B  | -2.01422200 | -2.01422200 | 0.84799800  |
| B  | -2.01422200 | -0.84799800 | 2.01422200  |
| B  | -2.01422200 | 0.84799800  | 2.01422200  |
| B  | 0.84799800  | -2.01422200 | -2.01422200 |
| B  | -0.84799800 | -2.01422200 | -2.01422200 |
| B  | -0.84799800 | -2.01422200 | 2.01422200  |
| B  | 0.84799800  | -2.01422200 | 2.01422200  |
| B  | 2.01422200  | -2.01422200 | 0.84799800  |
| B  | 2.01422200  | -2.01422200 | -0.84799800 |
| Ac | 0.00000000  | 3.75081700  | 0.00000000  |
| Ac | -3.75081700 | 0.00000000  | 0.00000000  |
| Ac | 0.00000000  | 0.00000000  | 3.75081700  |
| Ac | 0.00000000  | 0.00000000  | 0.00000000  |
| Ac | 0.00000000  | 0.00000000  | -3.75081700 |
| Ac | 3.75081700  | 0.00000000  | 0.00000000  |
| Ac | 0.00000000  | -3.75081700 | 0.00000000  |

$D_{9h} \text{Ac}_2\text{B}_9^- (7')$

|    |             |             |             |
|----|-------------|-------------|-------------|
| B  | 0.00000000  | 2.25385200  | 0.00000000  |
| B  | 1.44874800  | 1.72655100  | 0.00000000  |
| B  | 2.21961100  | 0.39137700  | 0.00000000  |
| B  | 1.95189300  | -1.12692600 | 0.00000000  |
| B  | 0.77086300  | -2.11792800 | 0.00000000  |
| B  | -0.77086300 | -2.11792800 | 0.00000000  |
| B  | -1.95189300 | -1.12692600 | 0.00000000  |
| B  | -2.21961100 | 0.39137700  | 0.00000000  |
| B  | -1.44874800 | 1.72655100  | 0.00000000  |
| Ac | 0.00000000  | 0.00000000  | 1.80853500  |
| Ac | 0.00000000  | 0.00000000  | -1.80853500 |

$T_d \text{Ac}_4\text{B}_{24} \text{(8')}$ 

|    |             |             |             |
|----|-------------|-------------|-------------|
| B  | 0.83696700  | -2.00045600 | 2.00045600  |
| B  | -0.55744000 | 0.55744000  | 2.79213700  |
| B  | 2.00045600  | -2.00045600 | 0.83696700  |
| B  | -0.83696700 | 2.00045600  | 2.00045600  |
| B  | -0.55744000 | 2.79213700  | 0.55744000  |
| B  | 0.55744000  | 0.55744000  | -2.79213700 |
| B  | 2.00045600  | 0.83696700  | -2.00045600 |
| B  | 0.55744000  | 2.79213700  | -0.55744000 |
| B  | 0.55744000  | -2.79213700 | 0.55744000  |
| B  | -0.55744000 | -0.55744000 | -2.79213700 |
| B  | -2.79213700 | 0.55744000  | 0.55744000  |
| B  | -2.79213700 | -0.55744000 | -0.55744000 |
| B  | -2.00045600 | 2.00045600  | 0.83696700  |
| B  | 2.79213700  | -0.55744000 | 0.55744000  |
| B  | 2.00045600  | 2.00045600  | -0.83696700 |
| B  | 0.55744000  | -0.55744000 | 2.79213700  |
| B  | 2.00045600  | -0.83696700 | 2.00045600  |
| B  | -0.55744000 | -2.79213700 | -0.55744000 |
| B  | 2.79213700  | 0.55744000  | -0.55744000 |
| B  | 0.83696700  | 2.00045600  | -2.00045600 |
| B  | -0.83696700 | -2.00045600 | -2.00045600 |
| B  | -2.00045600 | -0.83696700 | -2.00045600 |
| B  | -2.00045600 | -2.00045600 | -0.83696700 |
| B  | -2.00045600 | 0.83696700  | 2.00045600  |
| Ac | 1.85877900  | 1.85877900  | 1.85877900  |
| Ac | -1.85877900 | -1.85877900 | 1.85877900  |
| Ac | -1.85877900 | 1.85877900  | -1.85877900 |
| Ac | 1.85877900  | -1.85877900 | -1.85877900 |

$C_1 \text{La}_5\text{B}_{24}^+$  (9)

|    |             |             |             |
|----|-------------|-------------|-------------|
| B  | -2.71437600 | 0.65169600  | 0.85398700  |
| B  | -0.98165500 | -1.20101200 | 2.47091800  |
| B  | -2.74786500 | 0.54284000  | -0.83758400 |
| B  | 0.41074800  | -2.00040500 | 2.08629700  |
| B  | 1.57664100  | -2.32656200 | 0.91618800  |
| B  | 1.64515200  | 0.22152200  | -2.41572100 |
| B  | 0.40147100  | -0.85943000 | -2.72495300 |
| B  | 1.54745100  | -2.43336700 | -0.66130900 |
| B  | -2.18399500 | 1.91150400  | -0.08788500 |
| B  | 1.71082200  | 1.66117100  | -1.73379300 |
| B  | 1.72678100  | 0.52944100  | 2.30698000  |
| B  | 1.76382600  | 1.86967500  | 1.44689600  |
| B  | 1.85701200  | -1.09383800 | 2.01348300  |
| B  | -2.34394600 | -0.93001200 | -1.49295200 |
| B  | 0.34484000  | -2.25975300 | -1.82380000 |
| B  | -2.29209000 | -0.72464900 | 1.68297200  |
| B  | -2.79000200 | -0.86779200 | 0.10588700  |
| B  | -0.83569800 | 2.77443100  | -0.16271300 |
| B  | -1.06118200 | -1.51034700 | -2.25510500 |
| B  | 1.78880700  | -1.34854100 | -1.91529500 |
| B  | 0.57874100  | 2.66168300  | -1.02278700 |
| B  | 1.96385700  | 2.17920500  | -0.17549300 |
| B  | 0.60717400  | 2.77578400  | 0.65213500  |
| B  | 0.49407700  | -0.49960300 | 2.79861400  |
| La | 0.01366100  | -0.00759600 | 0.00043400  |
| La | 3.31892000  | -0.13706600 | -0.04651100 |
| La | -1.25648900 | -3.05449100 | 0.21699300  |
| La | -1.01168600 | 1.78760200  | 2.58125100  |
| La | -1.10533400 | 1.43579300  | -2.75435700 |

$C_1 \text{Ac}_5\text{B}_{24}^+(9')$ 

|    |             |             |             |
|----|-------------|-------------|-------------|
| B  | -2.44276300 | -0.41195200 | -1.60675900 |
| B  | -1.58563900 | 0.67396300  | 2.37397300  |
| B  | -2.09350000 | -1.87538900 | 0.83050200  |
| B  | -2.09051900 | -1.86548400 | -0.86177000 |
| B  | -1.57442100 | 0.70264600  | -2.37271600 |
| B  | 0.05166300  | 0.84753900  | -2.77864000 |
| B  | -0.75047400 | 2.04947000  | 1.98555900  |
| B  | -2.45117600 | -0.43094300 | 1.59117100  |
| B  | -0.95808200 | -2.74868600 | -0.01854800 |
| B  | -2.87152800 | -0.62050500 | -0.00985300 |
| B  | 2.38996400  | -0.67560900 | -1.59764600 |
| B  | 1.87851800  | -2.08268800 | -0.85418800 |
| B  | 0.15566500  | 2.85560700  | 0.81065400  |
| B  | -0.74230900 | 2.07382900  | -1.96336700 |
| B  | 0.97204800  | 1.98086700  | -1.96019300 |
| B  | 0.96337800  | 1.95593900  | 1.98938400  |
| B  | 0.03931400  | 0.81195800  | 2.78739700  |
| B  | 1.64076800  | 0.49633300  | 2.38033200  |
| B  | 0.65218600  | -2.83589900 | -0.01644900 |
| B  | 2.38393300  | -0.69576400 | 1.60050400  |
| B  | 1.87363900  | -2.09247900 | 0.83672200  |
| B  | 0.15953400  | 2.86679900  | -0.77558200 |
| B  | 2.78732700  | -0.92992100 | 0.00100900  |
| B  | 1.65110400  | 0.52629400  | -2.36641200 |
| Ac | 0.00107700  | 0.01112000  | -0.00027600 |
| Ac | -2.67350100 | 2.10316400  | 0.00732400  |
| Ac | -0.11443100 | -1.99036300 | 2.73037500  |
| Ac | 2.88718800  | 1.79967100  | 0.01713900  |
| Ac | -0.10250400 | -1.95594700 | -2.75484600 |



$T_d \text{Ac}_4\text{B}_{29}^- (10')$ 

|    |             |             |             |
|----|-------------|-------------|-------------|
| B  | -0.89006500 | -2.18991700 | -2.18991700 |
| B  | 0.64678100  | 0.64678100  | -2.80385900 |
| B  | -2.18991700 | -2.18991700 | -0.89006500 |
| B  | 0.89006500  | 2.18991700  | -2.18991700 |
| B  | 0.64678100  | 2.80385900  | -0.64678100 |
| B  | -0.64678100 | 0.64678100  | 2.80385900  |
| B  | -2.18991700 | 0.89006500  | 2.18991700  |
| B  | -0.64678100 | 2.80385900  | 0.64678100  |
| B  | -0.64678100 | -2.80385900 | -0.64678100 |
| B  | 0.64678100  | -0.64678100 | 2.80385900  |
| B  | 2.80385900  | 0.64678100  | -0.64678100 |
| B  | 2.80385900  | -0.64678100 | 0.64678100  |
| B  | 2.18991700  | 2.18991700  | -0.89006500 |
| B  | -2.80385900 | -0.64678100 | -0.64678100 |
| B  | -2.18991700 | 2.18991700  | 0.89006500  |
| B  | -0.64678100 | -0.64678100 | -2.80385900 |
| B  | -2.18991700 | -0.89006500 | -2.18991700 |
| B  | 0.64678100  | -2.80385900 | 0.64678100  |
| B  | -2.80385900 | 0.64678100  | 0.64678100  |
| B  | -0.89006500 | 2.18991700  | 2.18991700  |
| B  | 0.89006500  | -2.18991700 | 2.18991700  |
| B  | 2.18991700  | -0.89006500 | 2.18991700  |
| B  | 2.18991700  | -2.18991700 | 0.89006500  |
| B  | 2.18991700  | 0.89006500  | -2.18991700 |
| B  | 0.96009800  | -0.96009800 | 0.96009800  |
| B  | -0.96009800 | 0.96009800  | 0.96009800  |
| B  | -0.96009800 | -0.96009800 | -0.96009800 |
| B  | 0.96009800  | 0.96009800  | -0.96009800 |
| B  | 0.00000000  | 0.00000000  | 0.00000000  |
| Ac | 1.73449400  | 1.73449400  | 1.73449400  |
| Ac | -1.73449400 | 1.73449400  | -1.73449400 |
| Ac | -1.73449400 | -1.73449400 | 1.73449400  |
| Ac | 1.73449400  | -1.73449400 | -1.73449400 |

1D Ac<sub>10</sub>B<sub>32</sub> (11')

|    |           |           |           |
|----|-----------|-----------|-----------|
| B  | 0.3477020 | 0.6409886 | 0.6181548 |
| B  | 0.8494163 | 0.6414765 | 0.6186604 |
| B  | 0.3477266 | 0.6409838 | 0.4297470 |
| B  | 0.8494333 | 0.6414808 | 0.4292516 |
| B  | 0.1616680 | 0.6414840 | 0.4292470 |
| B  | 0.6633540 | 0.6409820 | 0.4297501 |
| B  | 0.1616642 | 0.6414828 | 0.6186662 |
| B  | 0.6633588 | 0.6409837 | 0.6181505 |
| B  | 0.0055566 | 0.6543564 | 0.5683319 |
| B  | 0.5055177 | 0.6564455 | 0.5704792 |
| B  | 0.0055615 | 0.6543474 | 0.4795885 |
| B  | 0.5055223 | 0.6564560 | 0.4774107 |
| B  | 0.0055650 | 0.5913266 | 0.4162447 |
| B  | 0.5055280 | 0.5934303 | 0.4142494 |
| B  | 0.0055667 | 0.5022844 | 0.4162601 |
| B  | 0.5055303 | 0.5001164 | 0.4142203 |
| B  | 0.0055643 | 0.4392375 | 0.4795508 |
| B  | 0.5055276 | 0.4372143 | 0.4775386 |
| B  | 0.0055594 | 0.4392303 | 0.5683725 |
| B  | 0.5055231 | 0.4372276 | 0.5703536 |
| B  | 0.0055558 | 0.5022997 | 0.6316553 |
| B  | 0.5055177 | 0.5000769 | 0.6337213 |
| B  | 0.0055541 | 0.5913156 | 0.6316696 |
| B  | 0.5055154 | 0.5934751 | 0.6336917 |
| B  | 0.3477551 | 0.4525877 | 0.4297451 |
| B  | 0.8494254 | 0.4521102 | 0.4292371 |
| B  | 0.1616834 | 0.4521089 | 0.4292356 |
| B  | 0.6633331 | 0.4525875 | 0.4297453 |
| B  | 0.1616792 | 0.4521139 | 0.6186802 |
| B  | 0.6633370 | 0.4525899 | 0.6181575 |
| B  | 0.3477311 | 0.4525870 | 0.6181587 |
| B  | 0.8494091 | 0.4521183 | 0.6186776 |
| Ac | 0.2388177 | 0.5467906 | 0.5239506 |
| Ac | 0.7723804 | 0.5467881 | 0.5239477 |
| Ac | 0.2575022 | 0.7321750 | 0.5239478 |
| Ac | 0.7535619 | 0.7321548 | 0.5239499 |

|    |           |           |           |
|----|-----------|-----------|-----------|
| Ac | 0.2573273 | 0.3614945 | 0.5239500 |
| Ac | 0.7537482 | 0.3615133 | 0.5239526 |
| Ac | 0.2575167 | 0.5467796 | 0.3385873 |
| Ac | 0.7535718 | 0.5467806 | 0.3386055 |
| Ac | 0.2575661 | 0.5467835 | 0.7093229 |
| Ac | 0.7534859 | 0.5467843 | 0.7093028 |

2D Ac<sub>10</sub>B<sub>32</sub> (12')

|    |           |           |           |
|----|-----------|-----------|-----------|
| B  | 0.6877102 | 0.0042564 | 0.6027397 |
| B  | 0.9875225 | 0.0042604 | 0.5430821 |
| B  | 0.2873359 | 0.0042566 | 0.6027396 |
| B  | 0.9875229 | 0.3040693 | 0.6027397 |
| B  | 0.9875234 | 0.3040788 | 0.4030192 |
| B  | 0.9875232 | 0.7044676 | 0.4030189 |
| B  | 0.9875227 | 0.7044436 | 0.6027396 |
| B  | 0.6877179 | 0.0042726 | 0.4030190 |
| B  | 0.2873292 | 0.0042728 | 0.4030191 |
| B  | 0.9875227 | 0.0042680 | 0.4626760 |
| Ac | 0.4875189 | 0.5042605 | 0.5028782 |
| Ac | 0.4875208 | 0.5042748 | 0.3175972 |
| Ac | 0.4875199 | 0.5042486 | 0.6881617 |

3D AcB<sub>6</sub> (13')

|    |           |           |           |
|----|-----------|-----------|-----------|
| B  | 0.7075093 | 0.9819103 | 0.9987204 |
| B  | 0.0064796 | 0.9819103 | 0.6997495 |
| B  | 0.0064796 | 0.9819103 | 0.2976898 |
| B  | 0.3054497 | 0.9819103 | 0.9987204 |
| B  | 0.0064796 | 0.2808798 | 0.9987203 |
| B  | 0.0064796 | 0.6829395 | 0.9987203 |
| Ac | 0.5064825 | 0.4819193 | 0.4987292 |
